# Supplementary material
Source: PubMed Central journal article supplement (PMC9764982)
Supplement: mmc1.pdf [file mmc1.pdf]

# THE LANCET

## Child & Adolescent Health

### Supplementary appendix

This appendix formed part of the original submission and has been peer reviewed. We post it as supplied by the authors.

Supplement to: Ladhani SN, Baawuah F, Beckmann J, et al. SARS-CoV-2 infection and transmission in primary schools in England in June–December, 2020 (sKIDs): an active, prospective surveillance study. *Lancet Child Adolesc Health* 2021; published online March 16. [http://dx.doi.org/10.1016/S2352-4642\(21\)00061-4](http://dx.doi.org/10.1016/S2352-4642(21)00061-4).

# **SUPPLEMENTARY MATERIAL**

**SARS-CoV-2 infection and transmission in primary schools  
in England in June–December, 2020 (sKIDs): an active,  
prospective surveillance study**

Ladhani et al.

**Supplementary Figure S1: sKIDs participating sites in England. The red dots indicate schools taking part in the blood sampling arm and the green dots indicate in the weekly swabbing arm**

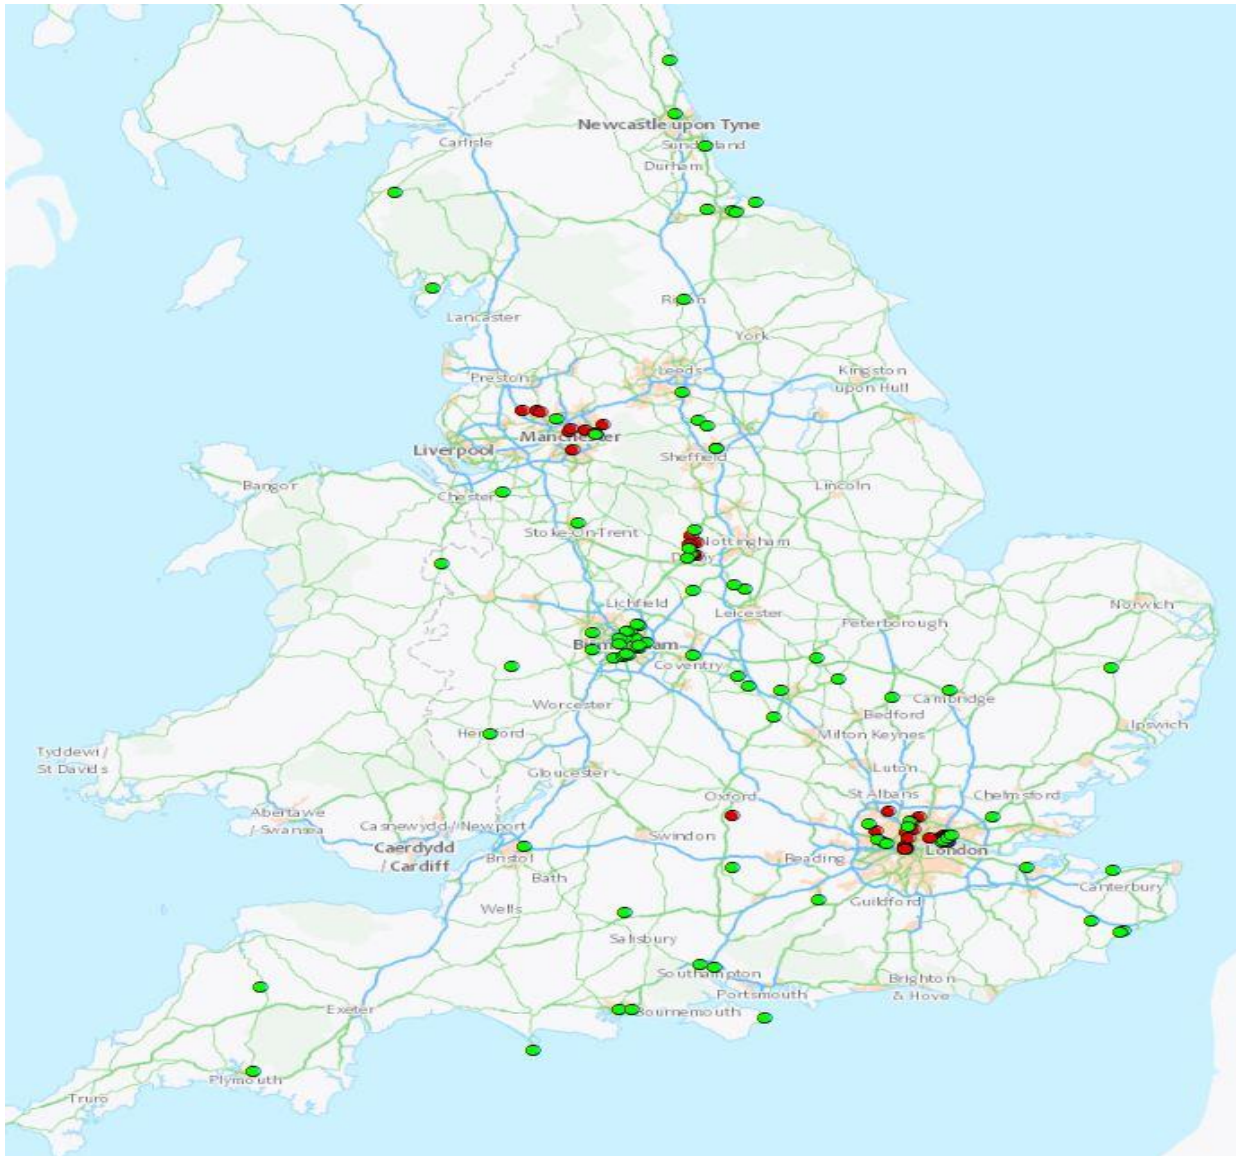

**Supplementary Table S2: Summary of participants with detectable SARS-CoV-2 RNA on nasal/throat swab RT-PCR.**

|   | Region     | Participant            | Symptomatic?                       | Infection Source         | RT-PCR testing*        | Retested RT-PCR | Antibody 4-6 weeks later | Household contacts | Outcome                                                                       | School action   |
|---|------------|------------------------|------------------------------------|--------------------------|------------------------|-----------------|--------------------------|--------------------|-------------------------------------------------------------------------------|-----------------|
| A | London     | Teacher                | Symptomatic a few weeks previously | Not identified           | Throat swab (Ct 35.27) | Positive        | Positive (2.96)          | All negative       | Likely recovering from past infection                                         | Bubble isolated |
| B | London     | Teaching assistant     | Symptomatic a few weeks previously | Not identified           | Throat swab (Ct 39.97) | Negative        | Negative (0.02)          | All negative       | SARS-CoV-2 infection unlikely                                                 | Bubble isolated |
| C | London     | Primary school student | Asymptomatic                       | Healthcare worker parent | Throat swab (Ct 31.74) | Positive        | Positive (6.2)           | All negative       | Asymptomatic infection                                                        | Bubble isolated |
| D | South East | Teacher                | Asymptomatic                       | Not identified           | Nose swab (Ct 40.05)   | Negative        | Negative (0.01)          | Lived alone        | SARS-CoV-2 infection unlikely                                                 | Bubble isolated |
| E | Midlands   | Teacher                | Symptomatic                        | Household member         | Nose swab (Ct 40.03)   | Negative        | Negative (0.01)          | Lived alone        | SARS-CoV-2 infection unlikely; School bubble tested – all negative            | Bubble isolated |
| F | Midlands   | Teacher                | Symptomatic                        | Not identified           | Nose swab (Ct 37.53)   | Positive        | Declined testing         | Declined testing   | Another staff member also tested positive; whole school tested – all negative | School closed   |

\* RT-PCR Cycle threshold (Ct)

**Supplementary Figure S3: Flow of participation in testing Rounds 1 (recruitment, June 2020), 2 (mid-July 2020) and 3 (December 2020) in primary schools involved in blood sampling for SARS-CoV-2 antibodies in addition to nasal and throat swabs for SARS-CoV-2 RT-PCR.**

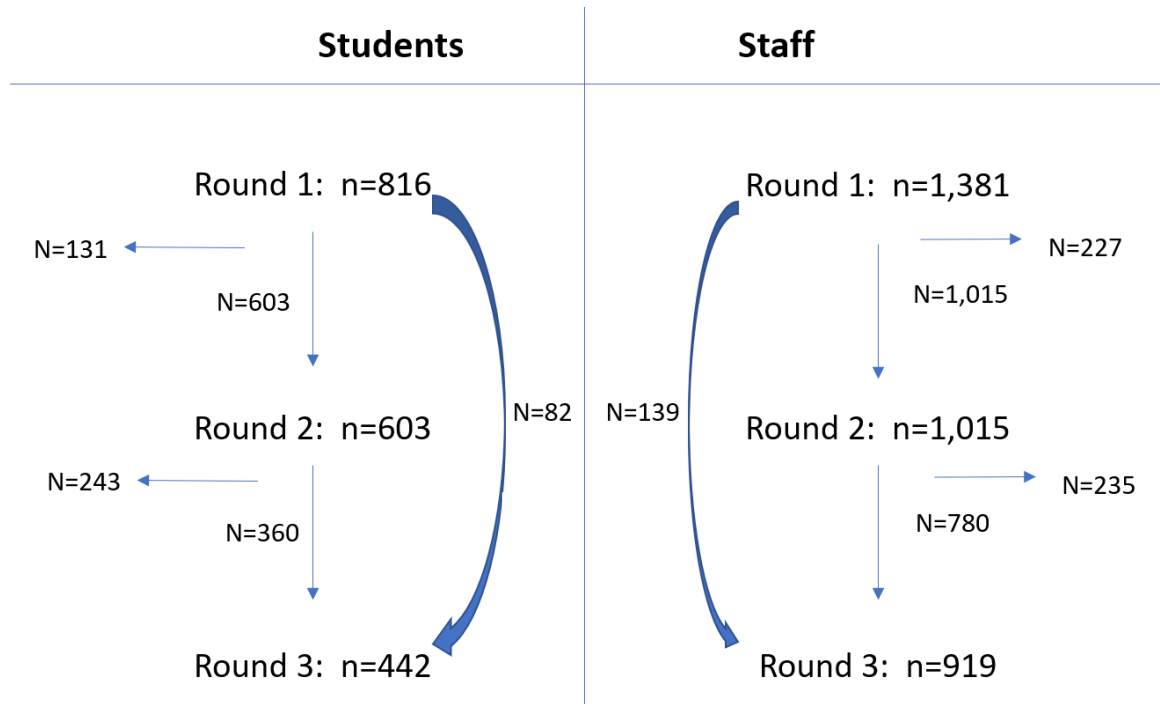

**Supplementary Table S4: Predictors of student participation in Rounds 2 and 3 using univariate and multivariable logistic regression in primary schools involved with blood sampling for SARS-CoV-2 antibodies**

*OR = odds ratio; CI = confidence interval*

|                                | Total      | Drop out: round 1 vs 2 |             |                  |         |                      |         | Drop out: round 1 vs 3 |             |                  |         |                      |         |
|--------------------------------|------------|------------------------|-------------|------------------|---------|----------------------|---------|------------------------|-------------|------------------|---------|----------------------|---------|
|                                |            | Number                 | Percent     | OR (95% CI)      | p-value | adjusted OR (95% CI) | p-value | Number                 | Percent     | OR (95% CI)      | p-value | adjusted OR (95% CI) | p-value |
| <b>Sex</b>                     |            |                        |             |                  |         |                      |         |                        |             |                  |         |                      |         |
| Male                           | 401        | 110                    | 27.4        | 1                |         | 1                    | 0.73    | 195                    | 48.6        | 1                | 0.12    | 1                    | 0.40    |
| Female                         | 415        | 103                    | 24.8        | 0.87 (0.64-1.19) | 0.40    | 0.94 (0.68-1.31)     |         | 179                    | 43.1        | 0.80 (0.61-1.06) |         | 0.88 (0.64-1.19)     |         |
| <b>Age cat</b>                 |            |                        |             |                  |         |                      |         |                        |             |                  |         |                      |         |
| 4-6 years                      | 322        | 85                     | 26.4        | 1                |         | 1                    |         | 111                    | 34.5        | 1                |         | 1                    |         |
| 7-9 years                      | 220        | 57                     | 25.9        | 0.98 (0.66-1.44) |         | 0.98 (0.65-1.49)     | 1.00    | 72                     | 32.7        | 0.92 (0.64-1.33) | <0.001  | 0.81 (0.55-1.20)     | <0.001  |
| 10-12 years                    | 274        | 71                     | 25.9        | 0.98 (0.68-1.41) | 0.99    | 0.99 (0.67-1.45)     |         | 191                    | 69.7        | 4.37 (3.10-6.18) |         | 4.38 (3.03-6.32)     |         |
| <b>Ethnicity</b>               |            |                        |             |                  |         |                      |         |                        |             |                  |         |                      |         |
| White                          | 497        | 109                    | 21.9        | 1                |         | 1                    |         | 224                    | 45.1        | 1                |         | 1                    |         |
| Black                          | 51         | 19                     | 37.3        | 2.11 (1.15-3.87) |         | 2.06 (1.09-3.91)     |         | 17                     | 33.3        | 0.61 (0.33-1.12) |         | 0.56 (0.28-1.10)     |         |
| Asian                          | 101        | 27                     | 26.7        | 1.30 (0.80-2.12) | 0.002   | 1.26 (0.74-2.13)     | 0.01    | 51                     | 50.5        | 1.24 (0.81-1.91) | 0.23    | 0.86 (0.53-1.42)     | 0.47    |
| Mixed                          | 81         | 25                     | 30.9        | 1.59 (0.95-2.67) |         | 2.24 (0.72-2.13)     |         | 42                     | 51.9        | 1.31 (0.82-2.10) |         | 1.09 (0.64-1.84)     |         |
| Other                          | 75         | 31                     | 41.3        | 2.51 (1.51-4.16) |         | 2.52 (1.45-4.37)     |         | 32                     | 42.7        | 0.91 (0.56-1.48) |         | 1.09 (0.62-1.91)     |         |
| Missing                        | 11         | 2                      | 18.2        |                  |         |                      |         | 8                      | 72.7        |                  |         |                      |         |
| <b>Region</b>                  |            |                        |             |                  |         |                      |         |                        |             |                  |         |                      |         |
| Derby                          | 154        | 23                     | 14.9        | 0.30 (0.18-0.50) |         | 0.28 (0.17-0.48)     |         | 52                     | 33.8        | 0.69 (0.46-1.05) |         | 0.88 (0.56-1.39)     |         |
| East London                    | 105        | 34                     | 32.4        | 0.81 (0.50-1.32) |         | 0.74 (0.45-1.24)     |         | 69                     | 65.7        | 2.61 (1.63-4.18) |         | 3.44 (2.03-5.84)     |         |
| Manchester                     | 192        | 34                     | 17.7        | 0.37 (0.23-0.57) | <0.001  | 0.39 (0.24-0.62)     | <0.001  | 114                    | 59.4        | 1.99 (1.36-2.90) | <0.001  | 2.37 (1.56-3.61)     | <0.001  |
| North London                   | 262        | 97                     | 37.0        | 1                |         | 1                    |         | 111                    | 42.4        | 1                |         | 1                    |         |
| Oxford                         | 103        | 25                     | 24.3        | 0.55 (0.33-0.91) |         | 0.70 (0.40-1.23)     |         | 28                     | 27.2        | 0.51 (0.31-0.84) |         | 0.54 (0.31-0.96)     |         |
| <b>Round 1 antibody result</b> |            |                        |             |                  |         |                      |         |                        |             |                  |         |                      |         |
| Negative                       | 725        | 182                    | 25.1        | 1                |         | 1                    | 0.58    | 332                    | 45.8        | 1                | 0.95    | 1                    | 0.74    |
| Positive                       | 91         | 31                     | 34.1        | 1.54 (0.97-2.45) | 0.07    | 1.15 (0.70-1.90)     |         | 42                     | 46.2        | 1.01 (0.66-1.57) |         | 0.92 (0.55-1.52)     |         |
| <b>Total</b>                   | <b>816</b> | <b>213</b>             | <b>26.1</b> |                  |         |                      |         | <b>374</b>             | <b>45.8</b> |                  |         |                      |         |

**Supplementary Table S5: Predictors of staff participation in Rounds 2 and 3 using univariate and multivariable logistic regression in primary schools involved with blood sampling for SARS-CoV-2 antibodies**

OR = odds ratio; CI = confidence interval

|                                | Total       |            |             | Drop out: round 1 vs 2 |         |                      |         | Drop out: round 1 vs 3 |             |                  |         |                      |         |
|--------------------------------|-------------|------------|-------------|------------------------|---------|----------------------|---------|------------------------|-------------|------------------|---------|----------------------|---------|
|                                | Number      | Percent    |             | OR (95% CI)            | p-value | adjusted OR (95% CI) | p-value | Number                 | Percent     | OR (95% CI)      | p-value | adjusted OR (95% CI) | p-value |
| <b>Sex</b>                     |             |            |             |                        |         |                      |         |                        |             |                  |         |                      |         |
| Male                           | 272         | 72         | 26.5        | 1                      |         | 1                    |         | 100                    | 36.8        | 1                |         | 1                    |         |
| Female                         | 1107        | 292        | 26.4        | 1.00 (0.74-1.34)       | 0.98    | 1.07 (0.78-1.47)     | 0.67    | 360                    | 32.5        | 0.83 (0.63-1.09) | 0.18    | 0.85 (0.64-1.14)     | 0.28    |
| Missing                        | 2           | 2          | 100.0       |                        |         |                      |         | 2                      | 100.0       |                  |         |                      |         |
| <b>Age cat</b>                 |             |            |             |                        |         |                      |         |                        |             |                  |         |                      |         |
| 20-29 years                    | 66          | 6          | 9.1         | 1                      |         |                      |         | 14                     | 21.2        | 1                |         |                      |         |
| 30-39 years                    | 139         | 25         | 18.0        | 2.19 (0.85-5.64)       |         |                      |         | 23                     | 16.5        | 0.74 (0.35-1.54) |         |                      |         |
| 40-49 years                    | 118         | 21         | 17.8        | 2.16 (0.83-5.67)       | 0.54    | N/A                  |         | 20                     | 16.9        | 0.76 (0.35-1.62) | 0.76    | N/A                  |         |
| 50-59 years                    | 125         | 21         | 16.8        | 2.02 (0.77-5.28)       |         |                      |         | 24                     | 19.2        | 0.88 (0.42-1.85) |         |                      |         |
| 60+ years                      | 36          | 5          | 13.9        | 1.61 (0.46-5.71)       |         |                      |         | 9                      | 25.0        | 1.24 (0.48-3.23) |         |                      |         |
| Missing                        | 897         | 288        | 32.1        |                        |         |                      |         | 372                    | 41.5        |                  |         |                      |         |
| <b>Ethnicity</b>               |             |            |             |                        |         |                      |         |                        |             |                  |         |                      |         |
| White                          | 1048        | 247        | 23.6        | 1                      |         | 1                    |         | 333                    | 31.8        | 1                |         | 1                    |         |
| Black                          | 71          | 31         | 43.7        | 2.51 (1.54-4.10)       |         | 1.70 (1.02-2.84)     |         | 34                     | 47.9        | 1.97 (1.22-3.20) |         | 1.64 (0.99-2.71)     |         |
| Asian                          | 163         | 58         | 35.6        | 1.79 (1.26-2.54)       | <0.001  | 1.18 (0.81-1.73)     | 0.34    | 63                     | 38.7        | 1.35 (0.96-1.90) | 0.02    | 1.08 (0.75-1.56)     | 0.27    |
| Mixed                          | 49          | 16         | 32.7        | 1.57 (0.85-2.90)       |         | 1.17 (0.62-2.20)     |         | 15                     | 30.6        | 0.95 (0.51-1.76) |         | 0.82 (0.43-1.54)     |         |
| Other                          | 31          | 7          | 22.6        | 0.95 (0.40-2.22)       |         | 1.17 (0.49-2.83)     |         | 7                      | 22.6        | 0.63 (0.27-1.47) |         | 0.69 (0.30-1.64)     |         |
| Missing                        | 19          | 7          | 36.8        |                        |         |                      |         | 10                     | 52.6        |                  |         |                      |         |
| <b>Region</b>                  |             |            |             |                        |         |                      |         |                        |             |                  |         |                      |         |
| Derby                          | 133         | 18         | 13.5        | 0.55 (0.32-0.96)       |         | 0.57 (0.32-1.00)     |         | 29                     | 21.8        | 0.61 (0.39-0.97) |         | 0.64 (0.40-1.02)     |         |
| East London                    | 489         | 190        | 38.9        | 2.25 (1.68-3.01)       |         | 2.21 (1.62-3.01)     |         | 203                    | 41.5        | 1.56 (1.19-2.04) |         | 1.52 (1.14-2.03)     |         |
| Manchester                     | 257         | 43         | 16.7        | 0.71 (0.48-1.06)       | <0.001  | 0.77 (0.51-1.15)     | <0.001  | 67                     | 26.1        | 0.77 (0.55-1.09) | <0.001  | 0.78 (0.55-1.10)     | <0.001  |
| North London                   | 431         | 95         | 22.0        | 1                      |         | 1                    |         | 135                    | 31.3        | 1                |         | 1                    |         |
| Oxford                         | 71          | 20         | 28.2        | 1.39 (0.79-2.44)       |         | 1.58 (0.87-2.88)     |         | 28                     | 39.4        | 1.43 (0.85-2.40) |         | 1.28 (0.73-2.24)     |         |
| <b>Round 1 antibody result</b> |             |            |             |                        |         |                      |         |                        |             |                  |         |                      |         |
| Negative                       | 1172        | 303        | 25.9        | 1                      |         | 1                    |         | 402                    | 34.3        | 1                |         | 1                    |         |
| Positive                       | 209         | 63         | 30.1        | 1.24 (0.90-1.71)       | 0.20    | 1.15 (0.82-1.62)     | 0.41    | 60                     | 28.7        | 0.77 (0.56-1.07) | 0.12    | 0.72 (0.52-1.01)     | 0.06    |
| <b>Total</b>                   | <b>1381</b> | <b>366</b> | <b>26.5</b> |                        |         |                      |         | <b>462</b>             | <b>33.5</b> |                  |         |                      |         |

**Supplementary table S6: Predictors of seroconversion using multivariable Poisson regression among school staff and students participating in SARS-CoV-2 surveillance in primary schools**

*IRR: Incidence rate ratio; CI = confidence interval*

|                          | Total        | Seroconverters |                       |         |
|--------------------------|--------------|----------------|-----------------------|---------|
|                          |              | n              | adjusted IRR (95% CI) | p-value |
| <b>Sex</b>               |              |                |                       |         |
| Female                   | 1,071        | 45             | 1                     | 0.33    |
| Male                     | 440          | 11             | 0.68 (0.32-1.47)      |         |
| <b>Ethnicity</b>         |              |                |                       |         |
| White                    | 1,128        | 35             | 1                     | <0.01   |
| Black                    | 64           | 4              | 1.94 (0.79-4.74)      |         |
| Asian                    | 162          | 11             | 3.00 (1.64-5.51)      |         |
| Mixed                    | 76           | 3              | 1.54 (0.39-6.10)      |         |
| Other                    | 63           | 2              | 0.97 (0.11-8.25)      |         |
| Missing                  | 18           | 1              |                       |         |
| <b>Region</b>            |              |                |                       |         |
| Derby                    | 236          | 13             | 2.48 (0.84-7.37)      | 0.01    |
| East London              | 338          | 9              | 0.63 (0.24-1.67)      |         |
| Manchester               | 340          | 19             | 2.38 (1.24-4.55)      |         |
| North London             | 456          | 12             | 1                     |         |
| Oxford                   | 141          | 3              | 1.48 (0.74-2.98)      |         |
| <b>Free school meals</b> |              |                |                       |         |
| per 1% increase          |              |                | 1.02 (1.00-1.05)      | 0.09    |
| <b>Participant type</b>  |              |                |                       |         |
| Student                  | 569          | 20             | 1                     | 0.36    |
| Staff                    | 942          | 36             | 1.28 (0.75-2.16)      |         |
| <b>Total</b>             | <b>1,511</b> | <b>56</b>      |                       |         |



**Supplementary Table S7: Data from Figure 1**

**Figure 1: Seropositivity in staff and students attending preschool and primary school in five English regions compared to regional seroprevalence during the first two weeks of June 2020.** Community seroprevalence from Ward et al. (2020) Antibody prevalence for SARS-CoV-2 following the peak of the pandemic in England: REACT2 study in 100,000 adults. DOI: 10.1101/2020.08.12.20173690  
*CI = confidence interval*

|              |                  | <b>Antibody positivity</b> | <b>Lower 95% CI</b> | <b>Upper 95% CI</b> |
|--------------|------------------|----------------------------|---------------------|---------------------|
| Derby        | Students (n=154) | 9.1                        | 3.7                 | 17.9                |
|              | Staff (n=133)    | 6.0                        | 2.0                 | 13.4                |
|              | Community        | 4.2                        | 3.7                 | 4.8                 |
| East London  | Students (n=105) | 21.9                       | 13.7                | 32.1                |
|              | Staff (n=489)    | 17.2                       | 11.5                | 24.2                |
|              | Community        | 13                         | 12.3                | 13.6                |
| Manchester   | Students (n=192) | 7.8                        | 5.7                 | 10.3                |
|              | Staff (n=257)    | 11.3                       | 7.6                 | 16.0                |
|              | Community        | 6.6                        | 6.1                 | 7.2                 |
| North London | Students (n=262) | 14.1                       | 9.9                 | 19.2                |
|              | Staff (n=431)    | 19.3                       | 14.0                | 25.5                |
|              | Community        | 13                         | 12.3                | 13.6                |
| Oxford       | Students (n=103) | 1.9                        | 0.2                 | 6.8                 |
|              | Staff (n=71)     | 7.0                        | 2.3                 | 15.7                |
|              | Community        | 3.9                        | 3.5                 | 4.3                 |
